# Supplementary material
Source: HighWire-hosted journal article supplement (https://erj.ersjournals.com/content/55/5/2001319)
Supplement: inline-supplementary-material-1 [file inline-supplementary-material-1.pdf]

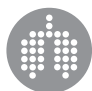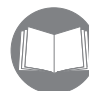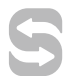

SHAREABLE PDF

# $F_{\text{ENO}}$ as a biomarker guide for inhaled corticosteroid step down in patients with mild-to-moderate well-controlled asthma

Anh Tuan Dinh-Xuan <sup>1</sup> and Guy Brusselle <sup>2,3</sup>

**Affiliations:** <sup>1</sup>Respiratory Physiology Unit, Dept of Respiratory Medicine, Cochin Hospital, AP-HP Centre – Université de Paris, Paris, France. <sup>2</sup>Dept of Respiratory Medicine, Ghent University Hospital, Ghent, Belgium. <sup>3</sup>Depts of Epidemiology and Respiratory Medicine, Erasmus Medical Center Rotterdam, Rotterdam, The Netherlands.

**Correspondence:** Anh Tuan Dinh-Xuan, Service de Physiologie, Hôpital Cochin, 27 rue du faubourg Saint-Jacques, 75014 Paris, France. E-mail: anh-tuan.dinh-xuan@aphp.fr

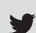

@ERSpublications

Reducing inhaled corticosteroid dose can be considered when  $F_{\text{ENO}}$  is less than 50 ppb in patients with well-controlled mild-to-moderate asthma. However, larger studies with longer follow-up are required in order to validate these preliminary data. <https://bit.ly/2SckpnE>

**Cite this article as:** Dinh-Xuan AT, Brusselle G.  $F_{\text{ENO}}$  as a biomarker guide for inhaled corticosteroid step down in patients with mild-to-moderate well-controlled asthma. *Eur Respir J* 2020; 55: 2001319 [<https://doi.org/10.1183/13993003.01319-2020>].

This single-page version can be shared freely online.

Nitric oxide (NO) is an endogenous gaseous molecule synthesised by practically all living cells [1]. It has an impressive wide range of physiological properties, justifying both its recognition as “molecule of the year” in 1992 [2], and in the 1998 Nobel Prize being awarded for nitric oxide discoveries 6 years later [3]. The first reports on the detection of NO in the exhaled air of healthy humans was published in 1991 [4], followed 2 years later by the very first description of increased exhaled NO in asthmatic patients [5]. In 1997, the European Respiratory Society issued the first technical recommendations regarding exhaled and nasal NO measurements [6]. Two years later the American Thoracic Society (ATS) introduced the fractional concentration of NO in the exhaled air ( $F_{\text{ENO}}$ ) as a noninvasive, reproducible and reliable online measurement of NO stemming from the large airways [7]. During the past two decades, numerous national and international societies have issued recommendations related to its practical measurement or clinical use in asthma [7–12]. Yet, some uncertainties or, at the very least, questions still remain regarding the utility of this simple point-of-care testing tool in asthma.
